# Supplementary material for: Metabolism and pharmacokinetics of a novel polyphenol fatty acid ester phloridzin docosahexaenoate in Balb/c female mice
Source: PubMed Central journal article supplement (PMC7721897; doi:10.1038/s41598-020-78369-0), 2020-12-07
Supplement: 41598_2020_78369_MOESM1_ESM.pdf [file 41598_2020_78369_MOESM1_ESM.pdf]

**SUPPLEMENTARY INFORMATION (TABLES)**

**Metabolism and pharmacokinetics of a novel polyphenol fatty acid ester phloridzin  
docosahexaenoate in Balb/c female mice**

Wasundara Fernando<sup>1</sup>, Kerry B. Goralski<sup>2,3,6,8</sup>, David W. Hoskin<sup>1,4,5</sup>, H. P. Vasantha  
Rupasinghe<sup>1,7\*</sup>

**Table S1. Reaction mixture used for the determination of *in vitro* phase I metabolism of PZ-DHA.**

DMSO: Dimethyl sulfoxide; NADPH: Nicotinamide adenine dinucleotide phosphate; PPB: Potassium phosphate buffer; PZ-DHA: Phloridzin docosahexaenoate.

| Sample ID | Components of the reaction mixture (*Final concentration) |                                                      |                                      |                |
|-----------|-----------------------------------------------------------|------------------------------------------------------|--------------------------------------|----------------|
|           | PZ-DHA<br>in DMSO<br>(*300 $\mu$ M) ( $\mu$ L)            | Mouse hepatic<br>microsomes<br>(*3 mg/mL) ( $\mu$ L) | NADPH in PPB<br>(*100 mM) ( $\mu$ L) | PPB ( $\mu$ L) |
| Test      | 6                                                         | 334                                                  | 100                                  | 1560           |
| Control 1 | -                                                         | 334                                                  | 100                                  | 1566           |
| Control 2 | 6                                                         | -                                                    | 100                                  | 1894           |
| Control 3 | 6                                                         | 334                                                  | -                                    | 1660           |
| Control 4 | 6                                                         | -                                                    | -                                    | 1994           |

**Table S2. Reaction mixture used for the determination of *in vitro* phase II methylation of PZ-DHA.**

DMSO: Dimethyl sulfoxide; PZ-DHA: Phloridzin docosahexaenoate; SAM: S-(5'-Adenosyl)-L-methionine chloride.

| Sample ID | Components of the reaction mixture (*Final concentration) |                                                      |                                                |                              |
|-----------|-----------------------------------------------------------|------------------------------------------------------|------------------------------------------------|------------------------------|
|           | PZ-DHA<br>in DMSO<br>(*300 $\mu$ M) ( $\mu$ L)            | Mouse hepatic<br>microsomes<br>(*3 mg/mL) ( $\mu$ L) | SAM in purified<br>water<br>(*1 mM) ( $\mu$ L) | Purified<br>water ( $\mu$ L) |
| Test      | 6                                                         | 334                                                  | 200                                            | 1460                         |
| Control 1 | -                                                         | 334                                                  | 200                                            | 1466                         |
| Control 2 | 6                                                         | -                                                    | 200                                            | 1894                         |
| Control 3 | 6                                                         | 334                                                  | -                                              | 1660                         |

**Table S3. Reaction mixture used for the determination of *in vitro* phase II glucuronidation of PZ-DHA.**

DMSO: Dimethyl sulfoxide; PZ-DHA: Phloridzin docosaheptaenoate; UDPGA: UDP-glucuronic acid.

| Sample ID | Components of the reaction mixture (*Final concentration) |                                                      |                                        |                                                                      |                                 |
|-----------|-----------------------------------------------------------|------------------------------------------------------|----------------------------------------|----------------------------------------------------------------------|---------------------------------|
|           | PZ-DHA<br>in DMSO<br>(*300 $\mu$ M)<br>( $\mu$ L)         | Mouse hepatic<br>microsomes<br>(*6 mg/mL) ( $\mu$ L) | UDPGA – Sol<br>A<br>(*2 mM) ( $\mu$ L) | Buffer with<br>Alamethicin – Sol<br>B (*25 $\mu$ g/mL)<br>( $\mu$ L) | Purified<br>water<br>( $\mu$ L) |
| Test      | 6                                                         | 334                                                  | 160                                    | 400                                                                  | 1100                            |
| Control 1 | -                                                         | 334                                                  | 160                                    | 400                                                                  | 894                             |
| Control 2 | 6                                                         | -                                                    | 160                                    | 400                                                                  | 1434                            |
| Control 3 | 6                                                         | 334                                                  | -                                      | 400                                                                  | 1260                            |

**Table S4. Reaction mixture used for the determination of *in vitro* phase II sulphation of PZ-DHA.**

DMSO: Dimethyl sulfoxide; PAPS: Adenosine 3'-phosphate 5'-phosphosulfate lithium salt hydrate; PZ-DHA: Phloridzin docosaheptaenoate.

| Sample ID | Components of the reaction mixture (*Final concentration) |                                                      |                                                   |                              |
|-----------|-----------------------------------------------------------|------------------------------------------------------|---------------------------------------------------|------------------------------|
|           | PZ-DHA<br>in DMSO<br>(*300 $\mu$ M) ( $\mu$ L)            | Mouse hepatic<br>microsomes<br>(*3 mg/mL) ( $\mu$ L) | PAPS in purified<br>water<br>(*0.5 mM) ( $\mu$ L) | Purified<br>water ( $\mu$ L) |
| Test      | 6                                                         | 334                                                  | 200                                               | 1460                         |
| Control 1 | -                                                         | 334                                                  | 200                                               | 1466                         |
| Control 2 | 6                                                         | -                                                    | 200                                               | 1894                         |
| Control 3 | 6                                                         | 334                                                  | -                                                 | 1660                         |
